# Supplementary material for: The Phosin PptA Plays a Negative Role in the Regulation of Antibiotic Production in Streptomyces lividans
Source: PubMed Central journal article supplement (PMC8003754; doi:10.3390/antibiotics10030325), 2021-03-20
Supplement: antibiotics-10-00325-s001.pdf [file antibiotics-10-00325-s001.pdf]

**Table 1** Bacterial strains used in this study

| Strains                           | Description                                                                    | Source or reference            |
|-----------------------------------|--------------------------------------------------------------------------------|--------------------------------|
| <i>Escherichia coli</i>           |                                                                                |                                |
| DH5 $\alpha$                      | General cloning host strain                                                    | Promega                        |
| DY330                             | Strain used for PCR-targeted mutagenesis                                       | Yu <i>et al.</i> (2000)        |
| S17.1                             | Strain used for conjugation from <i>E. coli</i> to <i>S. lividans</i>          | Simon <i>et al.</i> (1983)     |
| <i>Streptomyces coelicolor</i>    |                                                                                |                                |
| M145                              | SCP1 <sup>-</sup> , SCP2 <sup>-</sup>                                          | Hopwood <i>et al.</i> (1983)   |
| <i>Streptomyces lividans</i>      |                                                                                |                                |
| TK24                              | SLP2 <sup>-</sup> , SLP3 <sup>-</sup> , <i>strR</i>                            | Hopwood <i>et al.</i> (1983)   |
| $\Delta ppk$ ( <i>SLI_4384</i> )  | TK24 with <i>ppk::Ωhyg</i>                                                     | Chouayekh <i>et al.</i> (2002) |
| $\Delta phoP$ ( <i>SLI_4466</i> ) | TK24 with <i>phoP::Ωaac</i>                                                    | Ghorbel <i>et al.</i> (2006a)  |
| $\Delta SLI_4382$                 | TK24 with <i>SLI_4382::att3-aac</i>                                            | This work                      |
| $\Delta pptA$ ( <i>SLI_4383</i> ) | TK24 with <i>SLI_4383::att3-aac</i>                                            | This work                      |
| $\Delta pptA^{IFD}$               | TK24 with <i>SLI_4383::att3</i>                                                | This work                      |
| $\Delta pptA^{IFD}$ -C(-)         | $\Delta pptA^{IFD}$ with pSET152                                               | This work                      |
| $\Delta pptA^{IFD}$ -C(+)         | $\Delta pptA^{IFD}$ with pMES18, complementation strain of $\Delta pptA^{IFD}$ | This work                      |

IFD stands for In Frame Deletion

**Table 2** Plasmids used in this study

| Plasmids/Cosmids               | Description                                                                                                                                                                                            | Source or reference          |
|--------------------------------|--------------------------------------------------------------------------------------------------------------------------------------------------------------------------------------------------------|------------------------------|
| Construction of mutant strains |                                                                                                                                                                                                        |                              |
| StD84                          | Cosmid from the <i>S. coelicolor</i> genome library containing <i>SLI_4383</i> and <i>SLI_4382</i>                                                                                                     | Bentley <i>et al.</i> (2002) |
| pGEM-T Easy                    | <i>E. coli</i> vector for cloning of PCR DNA fragment, Amp <sup>R</sup>                                                                                                                                | Promega                      |
| pOSV236                        | <i>E.coli-Streptomyces</i> shuttle conjugative vector, Amp <sup>R</sup> , Tsr <sup>R</sup> , Pur <sup>R</sup> , containing <i>ptrc-xis-int</i> , used for apramycin cassette excision                  | Nguyen <i>et al.</i> (2010)  |
| pOSV234                        | <i>E. coli-Streptomyces</i> shuttle vector, source of the <i>aac</i> cassette, Amp <sup>R</sup> , Apr <sup>R</sup>                                                                                     | Karray (2005)                |
| pSET152                        | <i>E.coli-Streptomyces</i> shuttle conjugative vector, replicative in <i>E. coli</i> , Apr <sup>R</sup> , integrative in <i>Streptomyces</i> , used for genetic complementation in <i>Streptomyces</i> | Bierman <i>et al.</i> (1992) |
| pMES <i>pptA::aac</i>          | <i>pptA::att3aac</i> in StD84, Amp <sup>R</sup> , Apr <sup>R</sup>                                                                                                                                     | This work                    |
| pMES <i>SLI_4382::aac</i>      | <i>SLI_4382::att3aac</i> in StD84, Amp <sup>R</sup> , Apr <sup>R</sup>                                                                                                                                 | This work                    |
| pMES17                         | 1.5-kpb fragment containing <i>pptA</i> and its promoter region in pGEM-T Easy, Amp <sup>R</sup>                                                                                                       | This work                    |
| pMES18                         | 1.5-kpb fragment containing <i>pptA</i> and its promoter region in pSET152, Apr <sup>R</sup>                                                                                                           | This work                    |

Amp<sup>R</sup>; ampicillin resistant, Apr<sup>R</sup>; apramycin resistant, Pur<sup>R</sup>; puromycin resistant, Tsr<sup>R</sup>; thiostrepton resistant

**Table 3** Oligonucleotides used in this study

| Purpose                                          | Primer Pairs          | 5' → 3' sequence                                                       |
|--------------------------------------------------|-----------------------|------------------------------------------------------------------------|
| <b>Gene disruption</b>                           |                       |                                                                        |
| <i>pptA</i> ( <i>SLI_4383</i> )                  | NS1                   | CGCCCCGCACGCCGGCACCGAAGCGGGCACCGA<br>CGCCCTGATCGCGCGCGCTTCGTTGCGGACGAA |
|                                                  | NS2                   | ACGCCTCCCCTCGTCTCTGCGGCCGTTCTGCGA<br>CCGTTCCATCTGCCTCTTCGTCCCGAAGCAACT |
|                                                  | NS3                   | TCGCAGGAACGCCGCGCAGGACGACGGAGGCGT<br>ACGCACCATCGCGCGCGCTTCGTTGCGGACGAA |
|                                                  |                       | NS4                                                                    |
| <hr/>                                            |                       |                                                                        |
| Amplification of <i>pptA</i> ( <i>SLI_4383</i> ) | ED73<br>EC74          | CTCGAGAACGGCATGTCCGA<br>TGCGGCCGTTCTACGCCAG                            |
| <hr/>                                            |                       |                                                                        |
| Southern Blot verification of the mutants        | NS-F<br>NS-R          | TCTTGACGTCGACGGTCTTGATGC<br>ACCGGACGTCCGGCGACTCCCCCA                   |
| <hr/>                                            |                       |                                                                        |
| <b>Primers for 5'-RACE PCR</b>                   |                       |                                                                        |
| <i>SLI_4382</i>                                  | <i>SLI_4382</i> -GSP1 | TAGCCCGTCTCCTCCGCGAC                                                   |
|                                                  | <i>SLI_4382</i> -GSP2 | CCTTCGGGTGCGACCAAGTCG                                                  |
|                                                  | <i>SLI_4382</i> -GSP3 | GGACGCCACAGTACGCAGCC                                                   |
| <i>pptA</i> ( <i>SLI_4383</i> )                  | <i>pptA</i> -GSP1     | GCTCCAGACGGGACGCGTAC                                                   |
|                                                  | <i>pptA</i> -GSP2     | GCGGCTGGAAGGTGTGCAGG                                                   |
|                                                  | <i>pptA</i> -GSP3     | GTTCCCGGAGGGCACCGTTC                                                   |
| <hr/>                                            |                       |                                                                        |
| <b>Primers for qRT-PCR</b>                       |                       |                                                                        |
| <i>Reference genes</i>                           |                       |                                                                        |
| <i>SLI_6088</i> ( <i>hrdB</i> )                  | F                     | AAGGAAGACGGCGAGCTTCT                                                   |
|                                                  | R                     | GCACCGGGATACGGATGGTG                                                   |
| <i>SLI_2451</i> ( <i>glk</i> )                   | F                     | CAGCGCTCCACGGTCTACTT                                                   |
|                                                  | R                     | GTGATGCAGATGACGTTGC                                                    |
| <i>SLI_4040</i> ( <i>aspS</i> )                  | F                     | CTGCTGATGATCTCGGGCTT                                                   |
|                                                  | R                     | CGAGCTGGTAGAACTCGCC                                                    |
| <i>SLI_4129</i> ( <i>gyrA</i> )                  | F                     | GGCGACTCCTCCATCTACGA                                                   |
|                                                  | R                     | GACCATCTCCATCGACAGC                                                    |
| <i>SLI_4131</i> ( <i>gyrB</i> )                  | F                     | TCGAGACCACCGACTACTCCTT                                                 |
|                                                  | R                     | TCTTGACCTCGTGCTTCTCG                                                   |
| <i>SLI_4926</i> ( <i>rpoB</i> )                  | F                     | CTTCGAGCCTCCCAAGAACA                                                   |
|                                                  | R                     | TTGGTCATGAGCGGGAAGT                                                    |
| <i>Target genes</i>                              |                       |                                                                        |
| <i>Ppk</i> ( <i>SLI_4384</i> )                   | F (A)                 | AGTCCGCCAACATCAAGTGG                                                   |
|                                                  | R (B)                 | GCTTGCAGTGGGTCTTCAGG                                                   |
| <i>ppk-pptA</i> junction                         | F (C)                 | CTGCGCAACATCCAGGAGAT                                                   |
|                                                  | R (D)                 | GGGGTTCCGGTGGAAAGT                                                     |
| <i>pptA</i> ( <i>SLI_4383</i> )                  | F (E)                 | GTACGCGTCCGCTCGGAG                                                     |
|                                                  | R (F)                 | GCCCACCGTGAGGTTGC                                                      |
| <i>pptA-SLI_4382</i> junction                    | F (G)                 | CAGCGCATGAGGTGGAG                                                      |
|                                                  | R (H)                 | TCGTCTGCGGGGCTCA                                                       |
| <i>SLI_4382</i>                                  | F (I)                 | CCCGAAGTACGACGACTGGT                                                   |
|                                                  | R (J)                 | GAGGTAGCGCACGGTGGTC                                                    |
| <hr/>                                            |                       |                                                                        |
| <b>Primers for RT-PCR</b>                        |                       |                                                                        |
| <i>pptA</i> ( <i>SLI_4383</i> )                  | F (K)                 | TCTCCGGTTCGACGGCGTTC                                                   |
|                                                  | R (L)                 | TGGCCAGTAAGCGACCTTG                                                    |
